# Supplementary material for: Application of Binary Diagnostic Ratios of Polycyclic Aromatic Hydrocarbons for Identification of Tsunami 2004 Backwash Sediments in Khao Lak, Thailand
Source: Hindawi journal article supplement (doi:10.1155/2014/485068), 2014-01-01
Supplement: f1 [file 485068.f1.pdf]

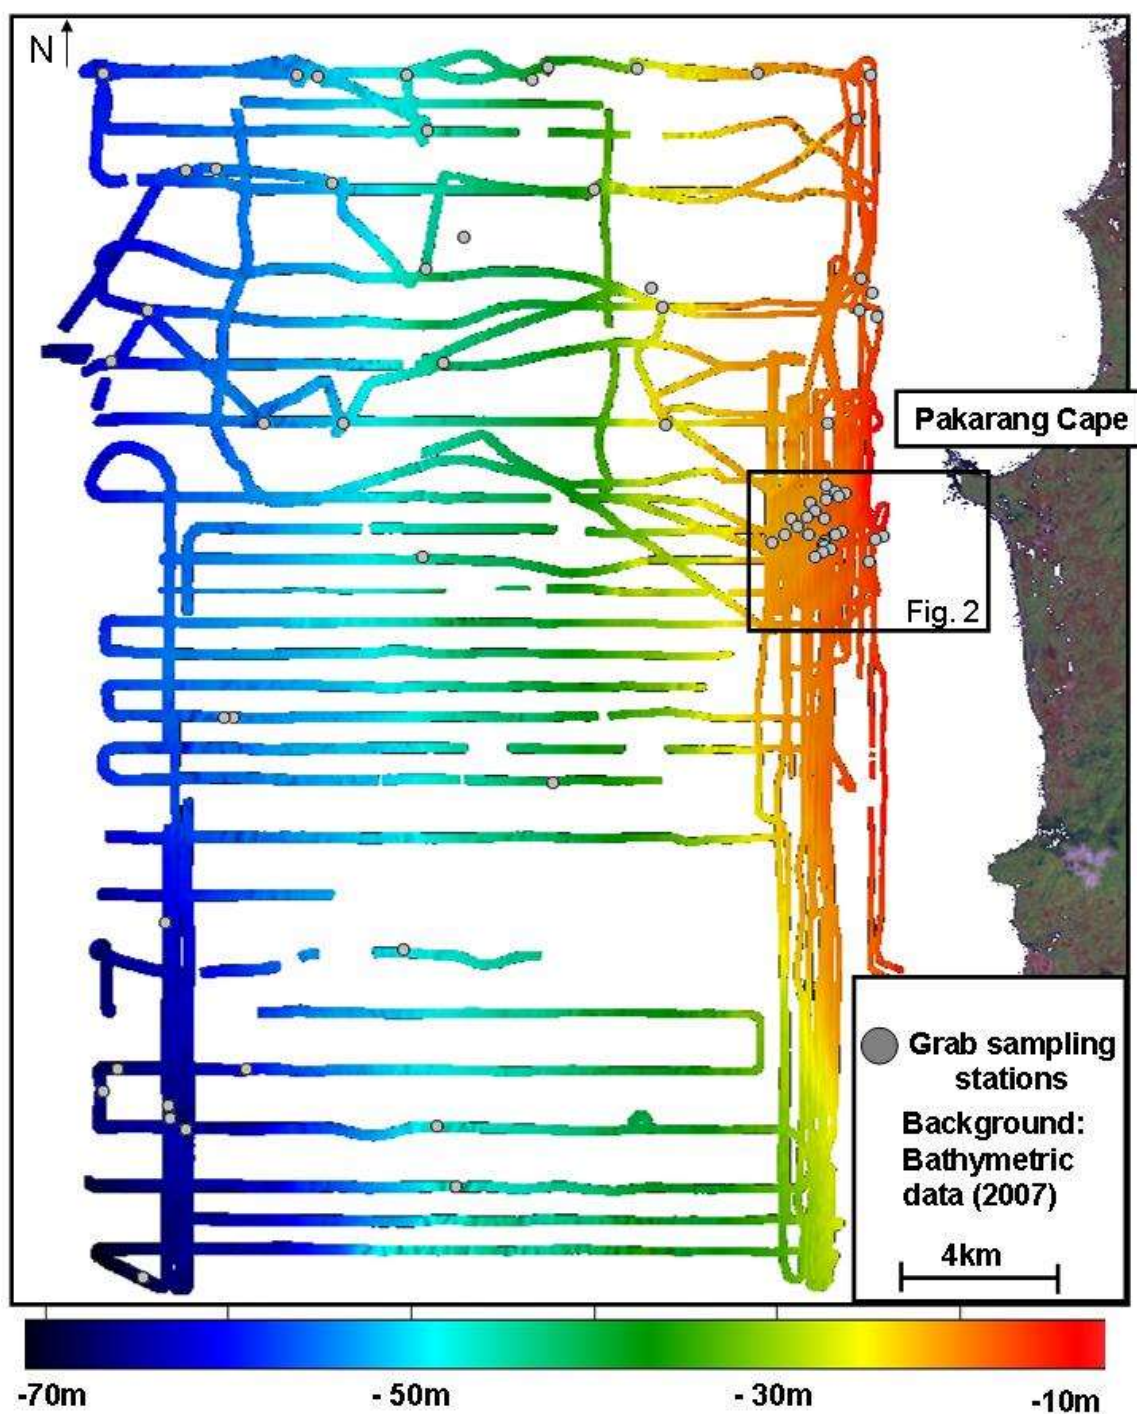

**Fig. S1.** Overview of multibeam echo sounder data and grab samples obtained during the 2007 cruise with RV CHAKRATONG TONGYAI. Bathymetry based on multibeam echo sounder data. Grab samples were taken during a cruise with RV CHAKRATONG TONGYAI in November and December 2007.

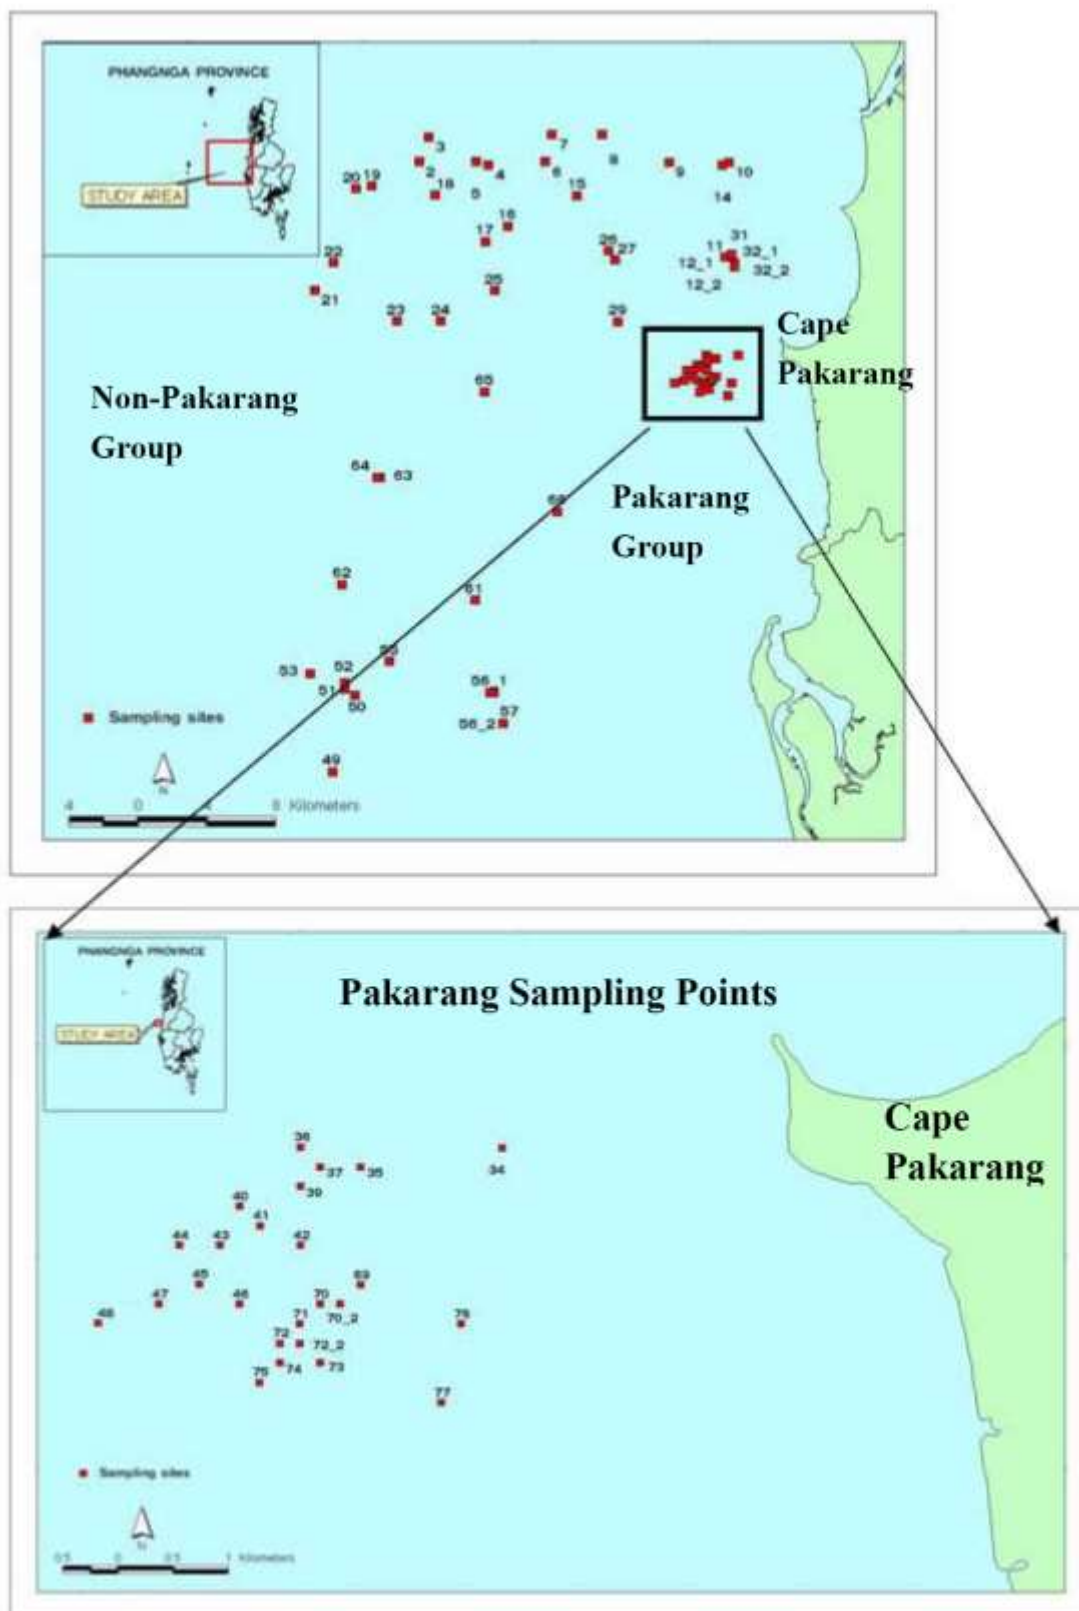

**Fig. S2.** Sampling site locations at the tsunami-affected coastal areas of Andaman Sea.

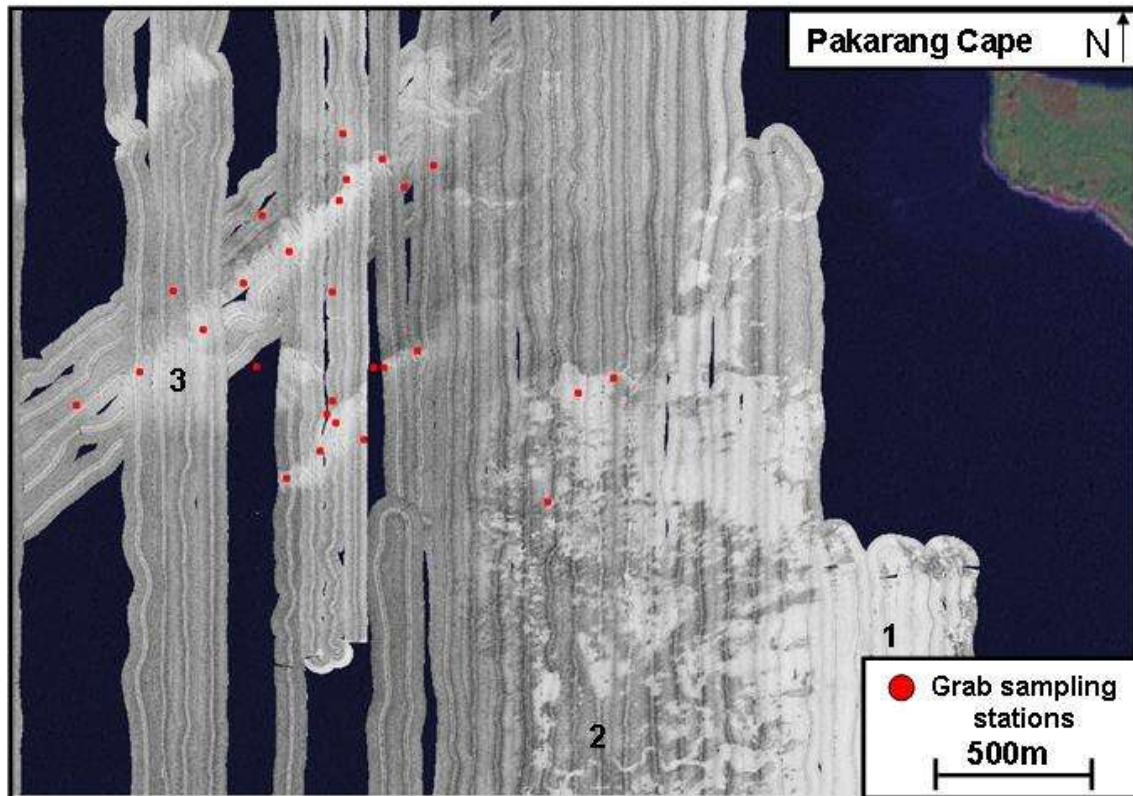

19  
20  
21  
22  
23  
24  
25  
26  
27  
28  
29

**Fig. S3.** Side Scan Sonar data (taken during the 2008 cruise with RV BOONLERT PASOOK) around Pakarang Cape. 1: Fine-grained sediments occur close to the coastline, in water depths between 5 and 10 m. 2: One of several small scale channels (width between 25 and 60 m) apparent in the side scan sonar data. 3: Area of elevated sediment transport structures. Sediment distribution is based on side scan sonar mapping. White colours reflect fine grained sediment, dark colours reflects more coarse grained sediment (sand).



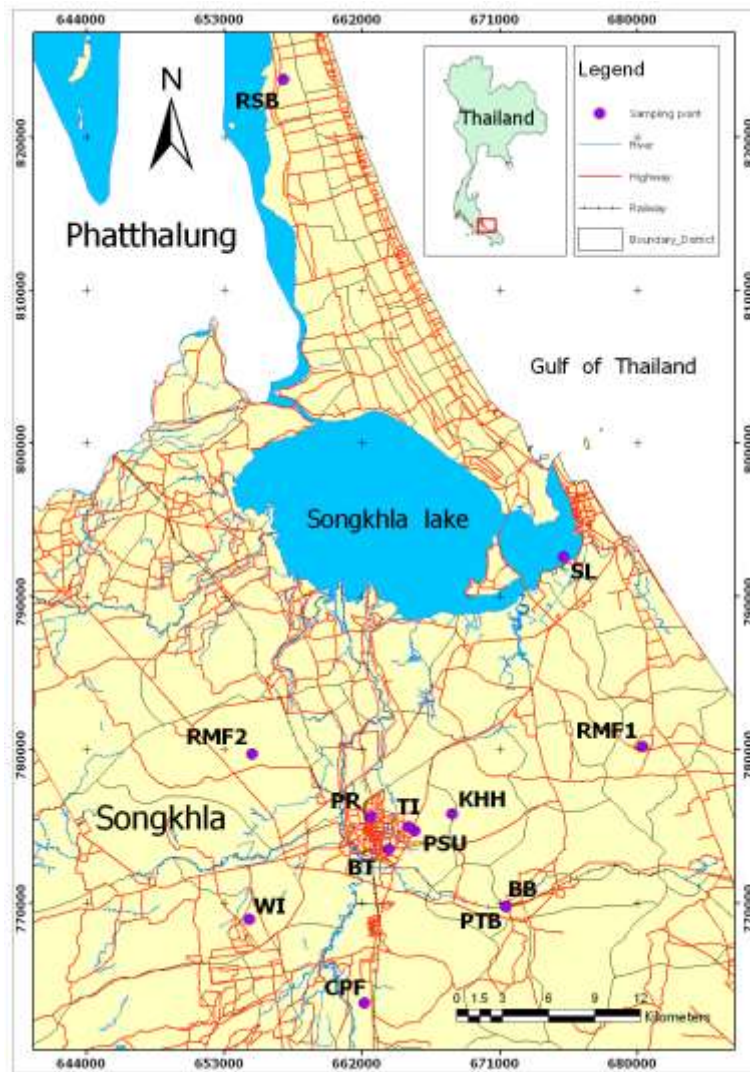

**Fig. S4.** Map of PM<sub>10</sub> sampling sites.
